# Supplementary material
Source: MDPI journal article supplement (https://www.mdpi.com/2304-6740/10/12/252)
Supplement: s1 [file s1]

# Electronic Supplementary Material

## **[Hexaamminecobalt(III)] Dichloride Permanganate – Structural Features and Heat-Induced Transformations into $M^{II}M^{III}_2O_4$ Spinel (M=Co, Mn, Co:Mn=1:1 and 1:3)**

**Laura Bereczki <sup>1</sup>, Vladimir M. Petruševski <sup>2</sup>, Fernanda Paiva Franguelli <sup>1,3</sup>, Kende Attila Béres <sup>1,4</sup>, Attila Farkas <sup>5</sup>, Berta Barta Holló <sup>6</sup>, Zsuzsanna Czégény <sup>1</sup>, Imre Miklós Szilágyi <sup>3</sup> and László Kótai <sup>1,7,\*</sup>**

<sup>1</sup> Research Centre for Natural Sciences, Hungarian Academy of Sciences, Magyar Tudósok krt. 2., H-1117 Budapest, Hungary

<sup>2</sup> Faculty of Natural Sciences and Mathematics, Ss. Cyril and Methodius University, Skopje, MK-1000, North Macedonia

<sup>3</sup> Department of Inorganic and Analytical Chemistry, Budapest University of Technology and Economics, Műegyetem rakpart 3, H-1111 Budapest, Hungary

<sup>4</sup> György Hevesy PhD School of Chemistry, Institute of Chemistry, ELTE Eötvös Loránd University, Pázmány Péter s. 1/A, H-1117 Budapest, Hungary

<sup>5</sup> Department of Organic Chemistry, Budapest University of Technology and Economics, Budafoki út 8, H-1111, Budapest, Hungary

<sup>6</sup> Department of Chemistry, Biochemistry and Environmental Protection, Faculty of Sciences, University of Novi Sad, Trg Dositeja Obradovića 3, 21000 Novi Sad, Serbia

<sup>7</sup> Deuton-X Ltd., Selmeci u. 89, H-2030, Érd, Hungary

\* Correspondence: kotai.laszlo@ttk.hu

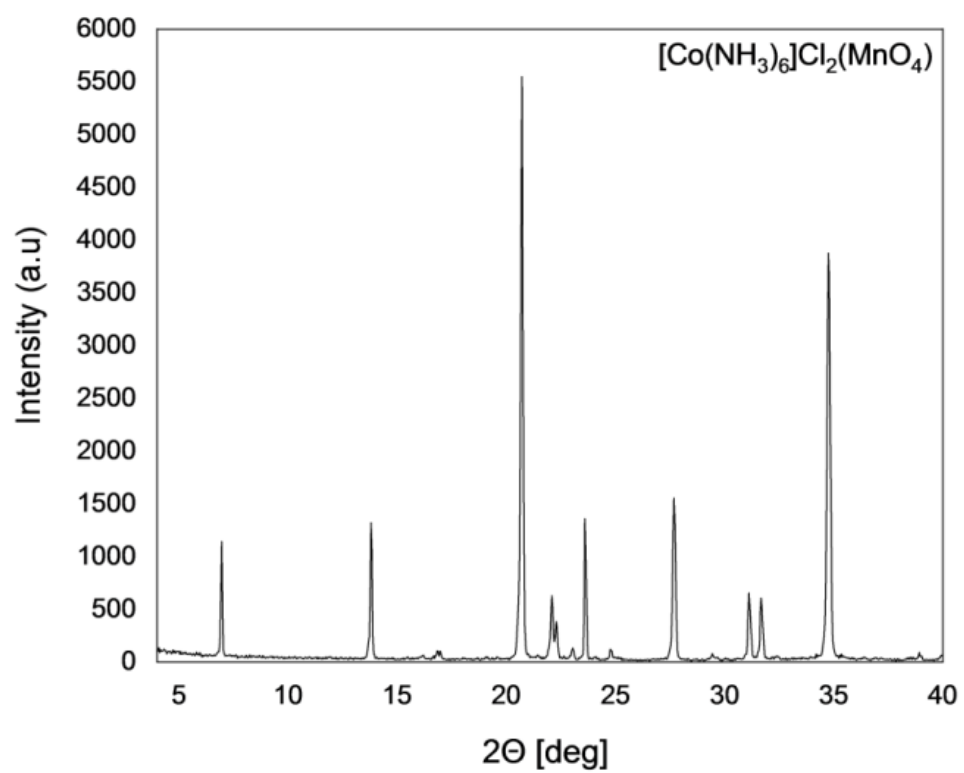

**ESI Figure S1.** The powder X-ray diffractogram of compound 1.

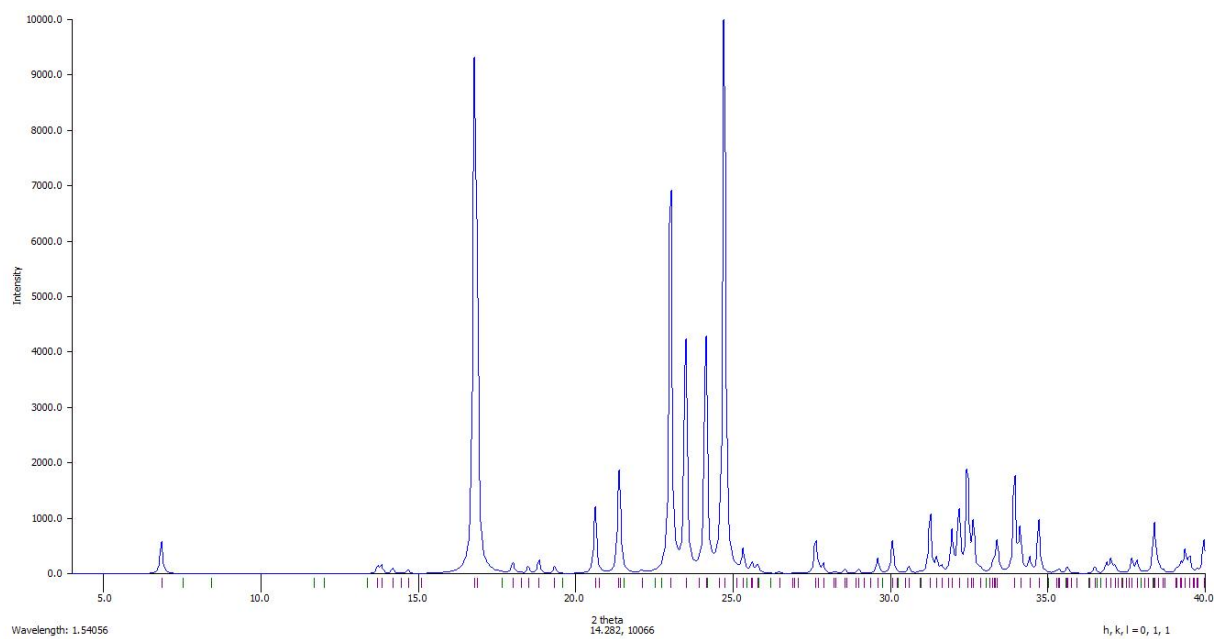

**ESI Figure S2.** The calculated (from SXRD data) powder X-ray diffractogram of compound 1.

**ESI Table S1.** Crystal data and structure refinement.

|                                             |                                                                                                                                  |
|---------------------------------------------|----------------------------------------------------------------------------------------------------------------------------------|
| Empirical formula                           | Cl <sub>2</sub> Co H <sub>18</sub> Mn N <sub>6</sub> O <sub>4</sub>                                                              |
| Formula weight                              | 350.97                                                                                                                           |
| Temperature                                 | 163(2)                                                                                                                           |
| Radiation and wavelength                    | Mo-K $\alpha$ , $\lambda$ =0.71075Å                                                                                              |
| Crystal system                              | monoclinic                                                                                                                       |
| Space group                                 | <i>P</i> 21/c                                                                                                                    |
| Unit cell dimensions                        | <i>a</i> =13.6133(7)Å<br><i>b</i> =7.3658(5)Å<br><i>c</i> =12.3682(6)Å<br>$\alpha$ =90°<br>$\beta$ =108.547(8)°<br>$\gamma$ =90° |
| Volume                                      | 1175.78(13)Å <sup>3</sup>                                                                                                        |
| Z                                           | 4                                                                                                                                |
| Density (calculated)                        | 1.983 Mg/m <sup>3</sup>                                                                                                          |
| Absorption coefficient, $\mu$               | 2.941 mm <sup>-1</sup>                                                                                                           |
| <i>F</i> (000)                              | 712                                                                                                                              |
| Crystal colour                              | red                                                                                                                              |
| Crystal description                         | platelet                                                                                                                         |
| Crystal size                                | 0.56 x 0.41 x 0.11 mm                                                                                                            |
| Absorption correction                       | numerical                                                                                                                        |
| Max. and min. transmission                  | 0.8680.987                                                                                                                       |
| $\theta$ -range for data collection         | $3.157 \leq \theta \leq 27.473^\circ$                                                                                            |
| Index ranges                                | $-17 \leq h \leq 17$ ; $-9 \leq k \leq 9$ ; $-16 \leq l \leq 15$                                                                 |
| Reflections collected                       | 18320                                                                                                                            |
| Completeness to $2\theta$                   | 1.000                                                                                                                            |
| Independent reflections                     | 2684 [ <i>R</i> (int) =0.0588]                                                                                                   |
| Reflections $I > 2\sigma(I)$                | 2351                                                                                                                             |
| Refinement method                           | full-matrix least-squares on <i>F</i> <sup>2</sup>                                                                               |
| Data / restraints / parameters              | 2684 /0 /136                                                                                                                     |
| Goodness-of-fit on <i>F</i> <sup>2</sup>    | 1.152                                                                                                                            |
| Final <i>R</i> indices [ $I > 2\sigma(I)$ ] | <i>R</i> 1 =0.0422, <i>wR</i> 2 =0.0854                                                                                          |
| <i>R</i> indices (all data)                 | <i>R</i> 1 =0.0528, <i>wR</i> 2 =0.0892                                                                                          |
| Max. and mean shift/esd                     | 0.000;0.000                                                                                                                      |
| Largest diff. peak and hole                 | 1.535;-0.574 e.Å <sup>-3</sup>                                                                                                   |

**ESI Table S2.** The hydrogen bond interactions in the crystal structure of hexamminecobalt(III) dichloro permanganate.

| Nr | Donor | H.... | Acceptor | Symm. code       | D – H (Å) | H...A (Å) | D...A (Å) | D - H...A (°) |
|----|-------|-------|----------|------------------|-----------|-----------|-----------|---------------|
| 1  | N1    | --H1A | ..Cl2    | x,1/2-y,1/2+z    | 0.91      | 2.44      | 3.289(3)  | 155           |
| 2  | N1    | --H1A | ..O3     | x,1/2-y,1/2+z    | 0.91      | 2.57      | 2.952(4)  | 106           |
| 3  | N1    | --H1B | ..Cl1    | x,y,z            | 0.91      | 2.42      | 3.327(3)  | 174           |
| 4  | N1    | --H1C | ..Cl1    | -x,-y,1-z        | 0.91      | 2.60      | 3.371(3)  | 143           |
| 5  | N1    | --H1C | ..O3     | x,1/2-y,1/2+z    | 0.91      | 2.59      | 2.952(4)  | 104           |
| 6  | N2    | --H2A | ..Cl1    | -x,1/2+y,1/2-z   | 0.91      | 2.42      | 3.309(4)  | 166           |
| 7  | N2    | --H2B | ..O4     | -x,-1/2+y,1/2-z  | 0.91      | 2.53      | 3.208(4)  | 132           |
| 8  | N2    | --H2C | ..Cl1    | x,y,z            | 0.91      | 2.56      | 3.399(3)  | 154           |
| 9  | N3    | --H3A | ..Cl1    | x,1+y,z          | 0.91      | 2.53      | 3.431(3)  | 168           |
| 10 | N3    | --H3B | ..O3     | x,y,z            | 0.91      | 2.55      | 2.941(4)  | 106           |
| 11 | N3    | --H3B | ..Cl1    | -x,1/2+y,1/2-z   | 0.91      | 2.61      | 3.408(4)  | 147           |
| 12 | N3    | --H3C | ..O3     | x,y,z            | 0.91      | 2.57      | 2.941(4)  | 105           |
| 13 | N3    | --H3C | ..Cl2    | x,1/2-y,1/2+z    | 0.91      | 2.69      | 3.541(3)  | 156           |
| 14 | N4    | --H4A | ..Cl2    | x,y,z            | 0.91      | 2.66      | 3.561(3)  | 170           |
| 15 | N4    | --H4B | ..O3     | x,1/2-y,-1/2+z   | 0.91      | 2.49      | 2.993(4)  | 115           |
| 16 | N4    | --H4C | ..O2     | x,3/2-y,-1/2+z   | 0.91      | 2.46      | 3.153(4)  | 133           |
| 17 | N5    | --H5A | ..Cl2    | 1-x,1/2+y,1/2-z  | 0.91      | 2.44      | 3.316(3)  | 161           |
| 18 | N5    | --H5B | ..Cl2    | x,y,z            | 0.91      | 2.77      | 3.338(3)  | 121           |
| 19 | N5    | --H5B | ..O1     | 1-x,-1/2+y,1/2-z | 0.91      | 2.32      | 3.146(4)  | 151           |
| 20 | N5    | --H5C | ..O1     | x,y,z            | 0.91      | 2.37      | 3.078(4)  | 135           |
| 21 | N5    | --H5C | ..O4     | x,y,z            | 0.91      | 2.45      | 3.305(4)  | 157           |
| 22 | N6    | --H6A | ..O4     | 1-x,1-y,-z       | 0.91      | 2.16      | 3.049(4)  | 166           |
| 23 | N6    | --H6B | ..O1     | x,1/2-y,-1/2+z   | 0.91      | 2.01      | 2.895(4)  | 165           |
| 24 | N6    | --H6C | ..O1     | 1-x,-1/2+y,1/2-z | 0.91      | 2.39      | 3.212(3)  | 151           |
| 25 | N6    | --H6C | ..O2     | 1-x,-1/2+y,1/2-z | 0.91      | 2.28      | 3.035(4)  | 140           |

**ESI Table S3.** The bond lengths (Å) and angles (°) in the crystal structure of hexamminecobalt(III) dichloro permanganate.

|               |          |               |          |
|---------------|----------|---------------|----------|
| Co1-N3        | 1.949(3) | Co1-N3#1      | 1.949(3) |
| Co1-N2        | 1.952(3) | Co1-N2#1      | 1.952(3) |
| Co1-N1        | 1.961(3) | Co1-N1#1      | 1.961(3) |
| Co2-N6        | 1.953(3) | Co2-N6#2      | 1.953(3) |
| Co2-N5        | 1.956(3) | Co2-N5#2      | 1.956(3) |
| Co2-N4        | 1.975(3) | Co2-N4#2      | 1.975(3) |
| Mn3-O3        | 1.605(2) | Mn3-O2        | 1.614(2) |
| Mn3-O1        | 1.621(3) | Mn3-O4        | 1.622(3) |
|               |          |               |          |
| N3-Co1-N3#1   | 180.0    | N3-Co1-N2     | 91.9(1)  |
| N3#1-Co1-N2   | 88.1(1)  | N3-Co1-N2#1   | 88.1(1)  |
| N3#1-Co1-N2#1 | 91.9(1)  | N2-Co1-N2#1   | 180.0    |
| N3-Co1-N1#1   | 90.3(1)  | N3#1-Co1-N1#1 | 89.8(1)  |
| N2-Co1-N1#1   | 89.3(1)  | N2#1-Co1-N1#1 | 90.7(1)  |
| N3-Co1-N1     | 89.8(1)  | N3#1-Co1-N1   | 90.3(1)  |
| N2-Co1-N1     | 90.7(1)  | N2#1-Co1-N1   | 89.3(1)  |
| N1#1-Co1-N1   | 180.0    | N6#2-Co2-N6   | 180.0    |
| N6#2-Co2-N5#2 | 90.4(1)  | N6-Co2-N5#2   | 89.6(1)  |
| N6#2-Co2-N5   | 89.6(1)  | N6-Co2-N5     | 90.4(1)  |
| N5#2-Co2-N5   | 180.0    | N6#2-Co2-N4   | 89.2(1)  |
| N6-Co2-N4     | 90.8(1)  | N5#2-Co2-N4   | 90.8(1)  |
| N5-Co2-N4     | 89.2(1)  | N6#2-Co2-N4#2 | 90.8(1)  |
| N6-Co2-N4#2   | 89.2(1)  | N5#2-Co2-N4#2 | 89.2(1)  |
| N5-Co2-N4#2   | 90.8(1)  | N4-Co2-N4#2   | 180.0    |
| O3-Mn3-O2     | 109.3(1) | O3-Mn3-O1     | 109.8(1) |
| O2-Mn3-O1     | 107.9(1) | O3-Mn3-O4     | 110.2(1) |
| O2-Mn3-O4     | 109.8(1) | O1-Mn3-O4     | 109.8(2) |

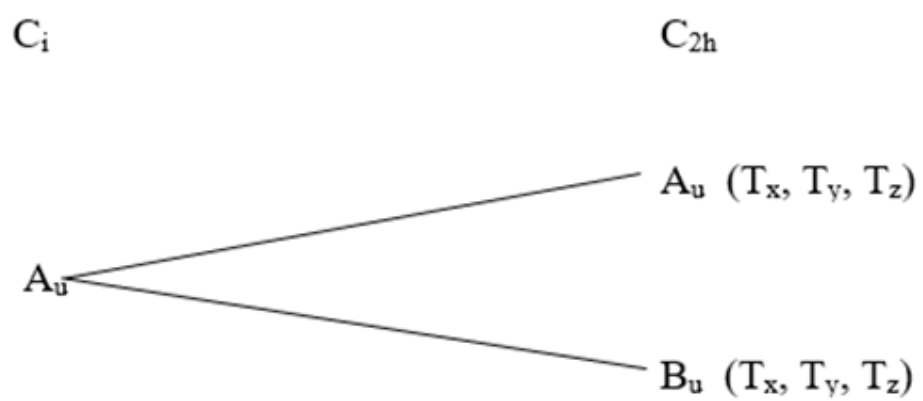

**ESI Figure S3.** The group analysis for Co atoms in compound **1**.

$C_1$

$C_{2h}$

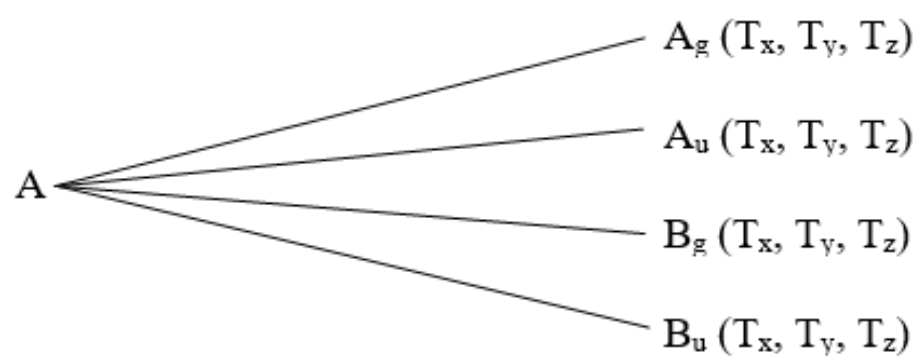

**ESI Figure S4.** The group analysis for Cl atoms in compound **1**.

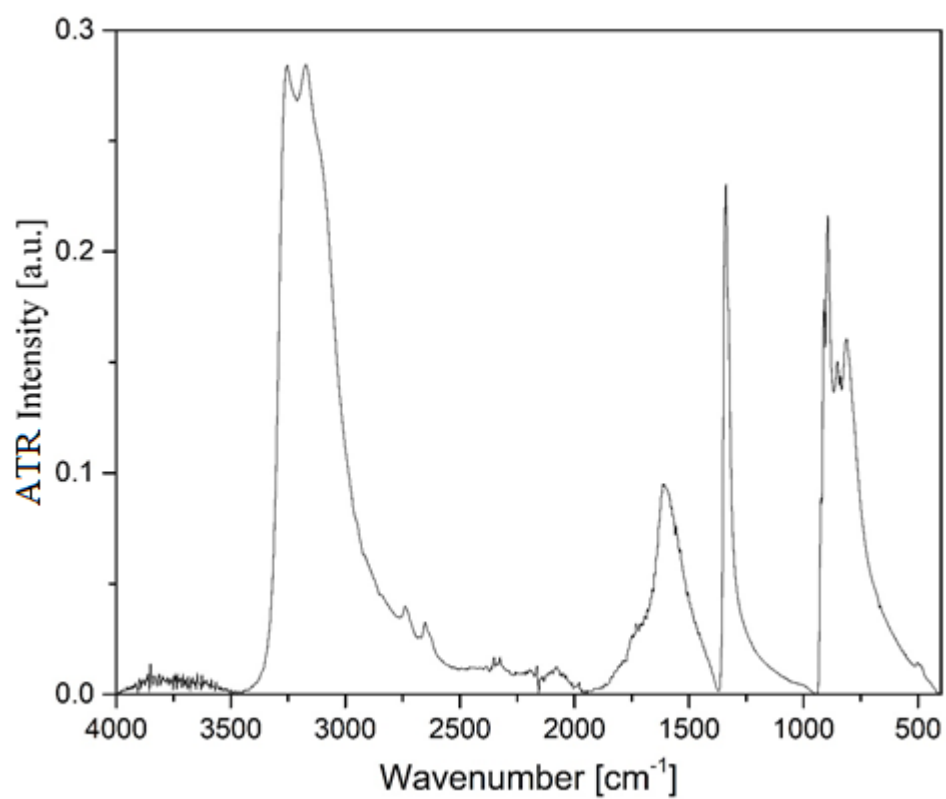

**ESI Figure S5.** The IR spectra of compound **1**.

**ESI Table S4.** The IR and Raman spectral data of permanganate ion in compound **1**.

| Band/assignment                               | Wavenumber             |                                    |                                     |
|-----------------------------------------------|------------------------|------------------------------------|-------------------------------------|
|                                               | IR                     | Raman (785 nm excitation)          |                                     |
|                                               |                        | 298 K                              | 123 K                               |
| $\nu_1(\text{Mn-O}), \nu_s(\text{A})$         | 852 (w)                | 843 (vs)                           | 843 (vs)                            |
| $\nu_2(\text{Mn-O}), \delta_s(\text{E})$      | 350sh                  | 350 (s)                            | 350 (s)                             |
| $\nu_3(\text{Mn-O}), \nu_{as}(\text{F}_2)$    | 924sh, 910,<br>894(vs) | 928 922, 917,<br>912sh, 897<br>(m) | 927, 922,<br>917, 912sh,<br>896 (m) |
| $\nu_4(\text{Mn-O}), \delta_{as}(\text{F}_2)$ | 388 (m)                | 398sh, 391                         | 398sh, 393                          |

vw-very weak, w-weak, m-medium, s-strong, vs-very strong; \*might be combined with Co-N modes

**ESI Table S5.** The IR and Raman spectral data of the ammonia ligand in compound **1**.

| Band/Assignment           | Wavenumber, cm <sup>-1</sup> |                                       |                                       |
|---------------------------|------------------------------|---------------------------------------|---------------------------------------|
|                           | IR, 298 K                    | Raman, 785 nm<br>excitation,<br>298 K | Raman, 785 nm<br>excitation,<br>123 K |
| $\rho(\text{NH}_3)$       | 813 (m)                      | 800 (vw)                              | 800 (vw)                              |
| $\delta_s(\text{HNH})$    | 1340 (m),<br>1327sh          | 1331, 1324,<br>1317 (w)               | 1330,<br>1323,1305 (w)                |
| $\delta_{as}(\text{HNH})$ | 1608 (m)                     | -                                     | -                                     |
| $\nu_s(\text{NH})$        | 3174 (vs)                    | -                                     | -                                     |
| $\nu_{as}(\text{NH})$     | 3256 (vs)                    | -                                     | -                                     |

**ESI Table S6.** The IR and Raman spectral data of the CoN<sub>6</sub> skeleton in compound **1**.

| Band/Assignment               | Wavenumber, cm <sup>-1</sup> |                                 |                                 |
|-------------------------------|------------------------------|---------------------------------|---------------------------------|
|                               | IR, 298 K                    | Raman, 785 nm excitation, 298 K | Raman, 785 nm excitation, 123 K |
| $\nu_1(\nu_{\text{CoN}})$     | 547 (m)                      | 506,500 (m)                     | 507, 499 (m)                    |
| $\nu_2(\nu_{\text{as}})$      |                              | 460, 455, 445 (m)               | 460, 453, 446 (m)               |
| $\nu_3(\nu_{\text{s}})$       | 485 (vw)-                    | -                               | 490 (w)                         |
| $\nu_4(\delta_{\text{as}})$   | 317 (vs)                     | -                               | 320 (vw)                        |
| $\nu_5(\delta_{\text{s}})$    |                              | 311,306 (w)                     | 311, 306 (w)                    |
| $\nu_6(\delta_{\text{NCoN}})$ | 250sh                        | -                               | -                               |

**ESI Table S7.** Electronic transitions (in nm) of the hexaamminecobalt(III) cation in compound **1** and in octahedral and trigonally distorted (compressed) octahedral structures.

| Assignment<br>in O<br>symmetry | Assignment<br>in D <sub>3</sub><br>symmetry | Compound<br><b>1</b> | Compound<br><b>4</b> [48] | Calculated DFT<br>(LC-BLYP/6-31G) |
|--------------------------------|---------------------------------------------|----------------------|---------------------------|-----------------------------------|
| $^1A_1 \rightarrow ^3T_1$      | $^1A_1 \rightarrow ^3E$                     | 830                  | 833                       | 806                               |
|                                | $^1A_1 \rightarrow ^3A_2$                   |                      |                           | 775                               |
| $^1A_1 \rightarrow ^5T_2$      | $^1A_1 \rightarrow ^5E$                     | 727                  | 730                       | 740                               |
|                                | $^1A_1 \rightarrow ^5A_1$                   |                      |                           | 724                               |
| $^1A_1 \rightarrow ^3T_2$      | $^1A_1 \rightarrow ^3E$                     | -                    | 617                       | 613                               |
|                                | $^1A_1 \rightarrow ^3A_1$                   | 575sh                | 581                       | 585                               |
| $^1A_1 \rightarrow ^1T_1$      | $^1A_1 \rightarrow ^1E$                     | 490                  | 486                       | 465                               |
|                                | $^1A_1 \rightarrow ^1A_2$                   | 450                  | 444                       | 459                               |
| $^1A_1 \rightarrow ^1T_2$      | $^1A_1 \rightarrow ^1E$                     | 375                  | 367                       | 367                               |
|                                | $^1A_1 \rightarrow ^1A_1$                   | 343,330sh            | 324                       | 327                               |

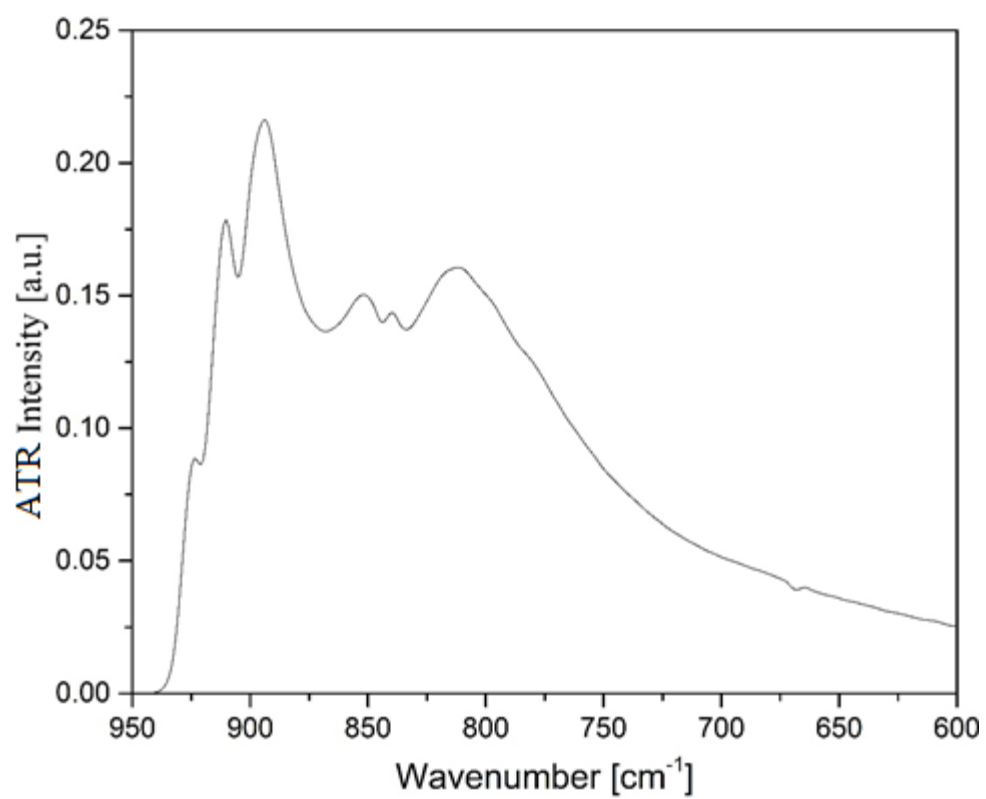

**ESI Figure S6.** The IR spectra of compound **1** between 950  $\text{cm}^{-1}$  and 600  $\text{cm}^{-1}$ .

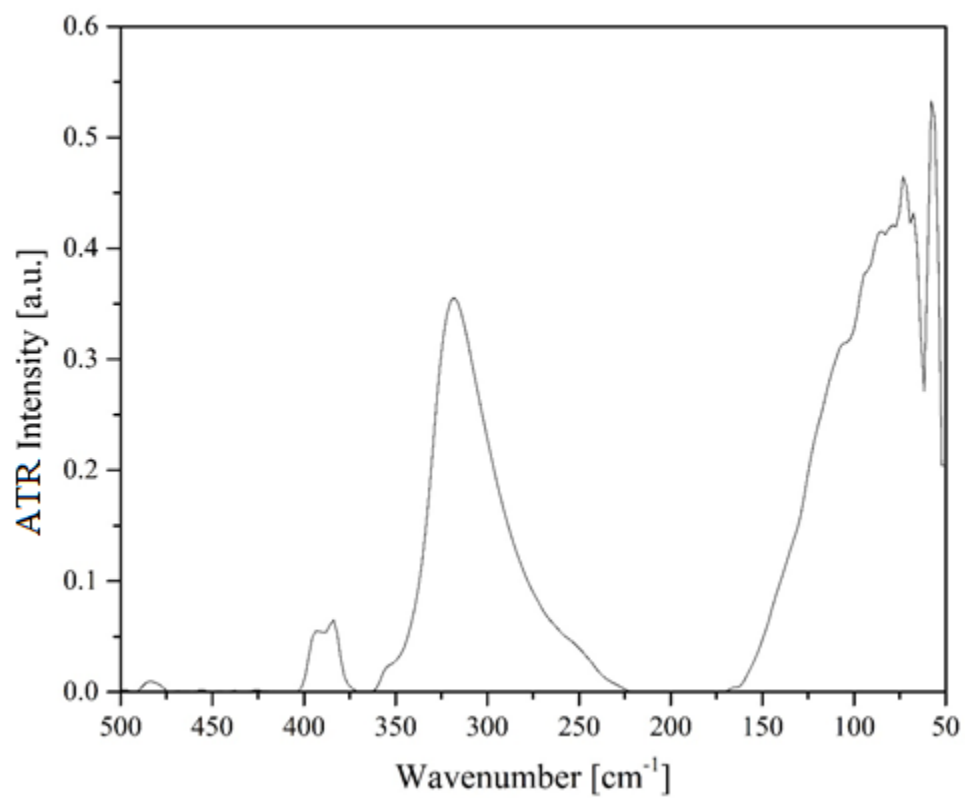

**ESI Figure S7.** The far-range IR spectra of compound **1**.

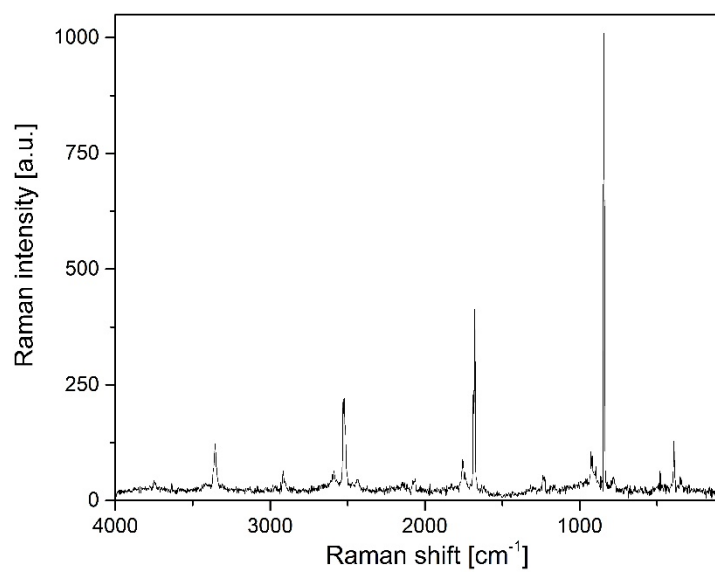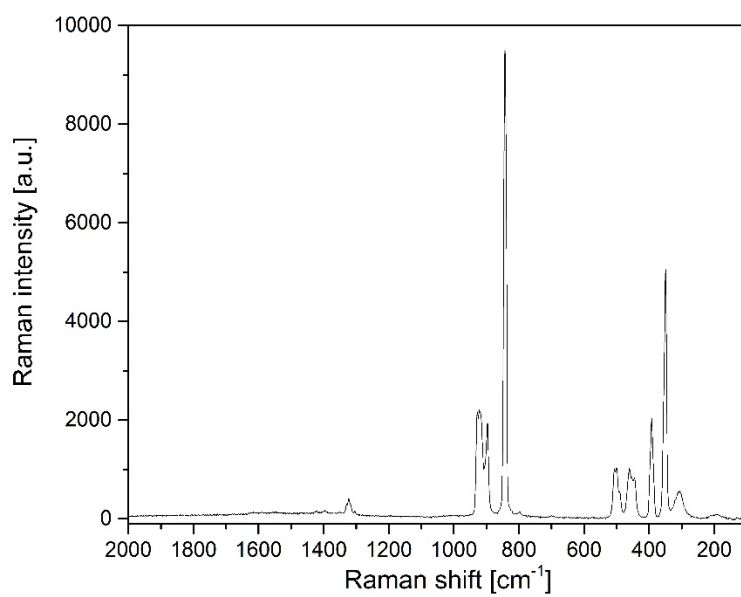

**ESI Figure S8.** The Raman spectra (at room temperature) of compound **1** with (a) 532 and (b) 785 nm excitation.

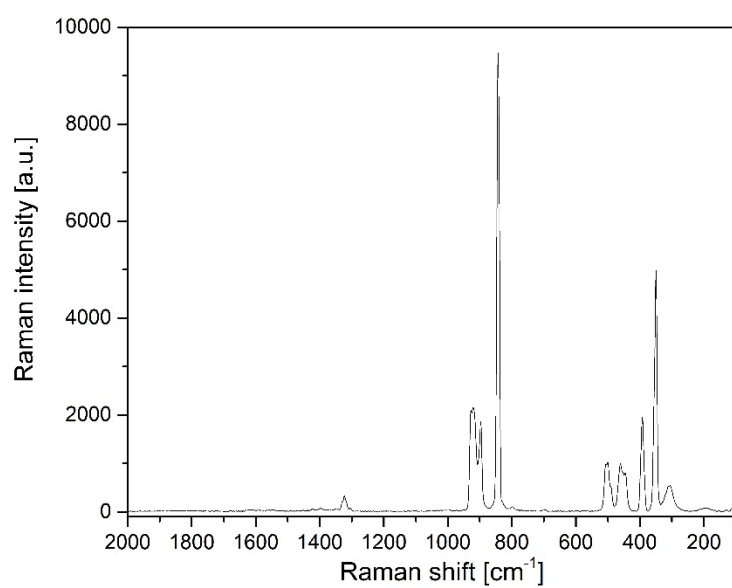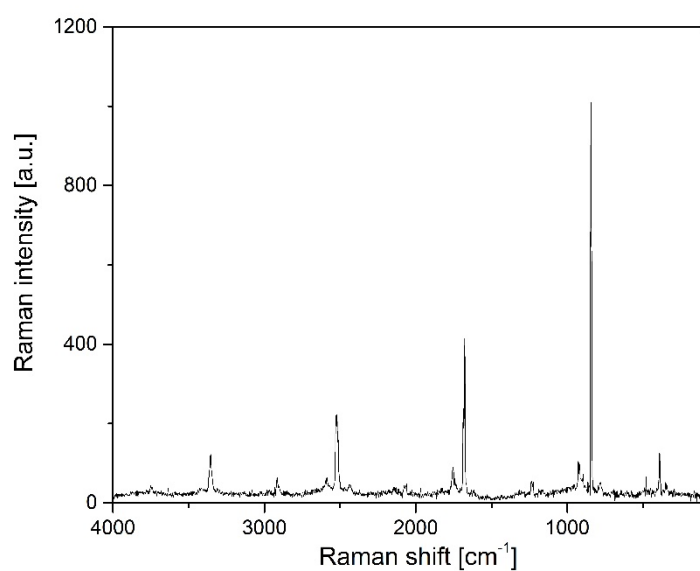

**ESI Figure S9.** The Raman spectra (at 123K) of compound 1 with (a) 532 and (b) 785 nm excitation.

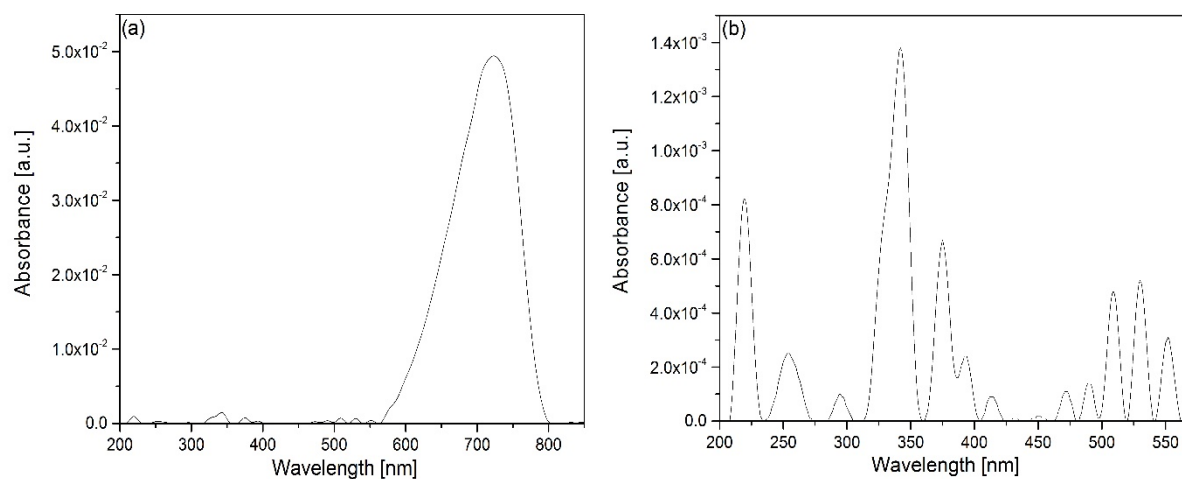

**ESI Figure S10.** The (a) full range and (b) 200-570 nm range UV-VIS spectra of compound 1.

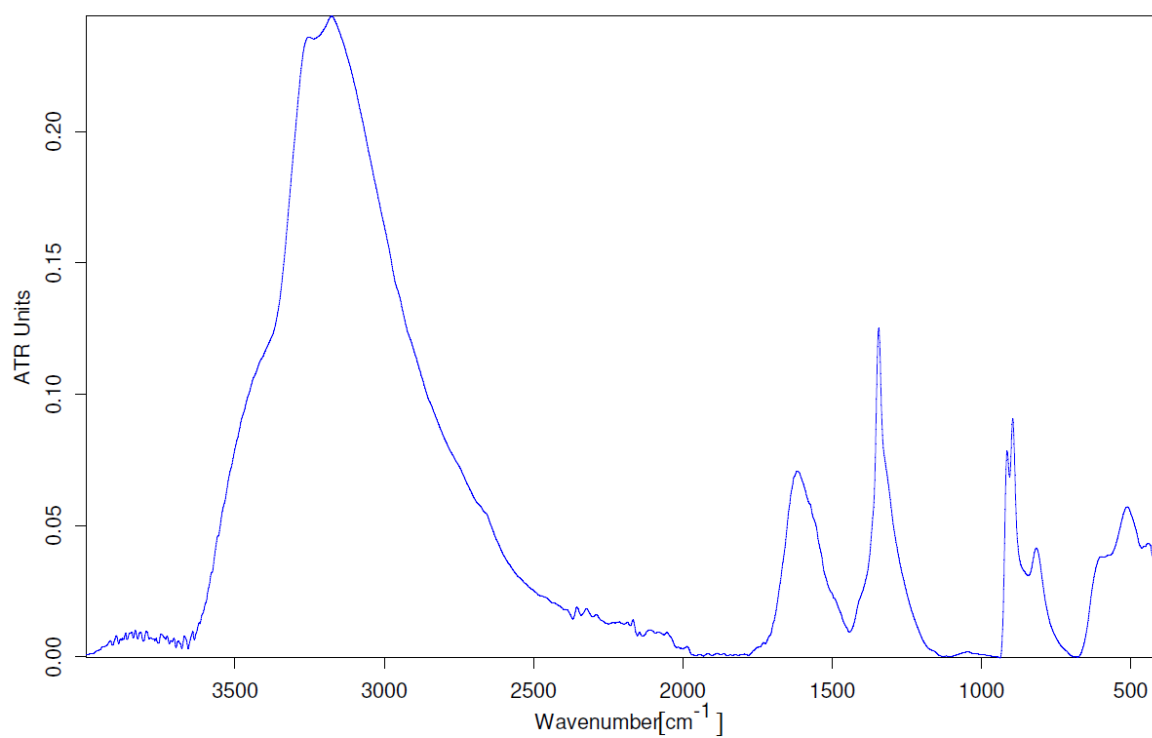

**ESI Figure S11.** The IR spectra of the evaporation residue from the aqueous extract of the decomposition intermediate made in boiling toluene from compound **1**.

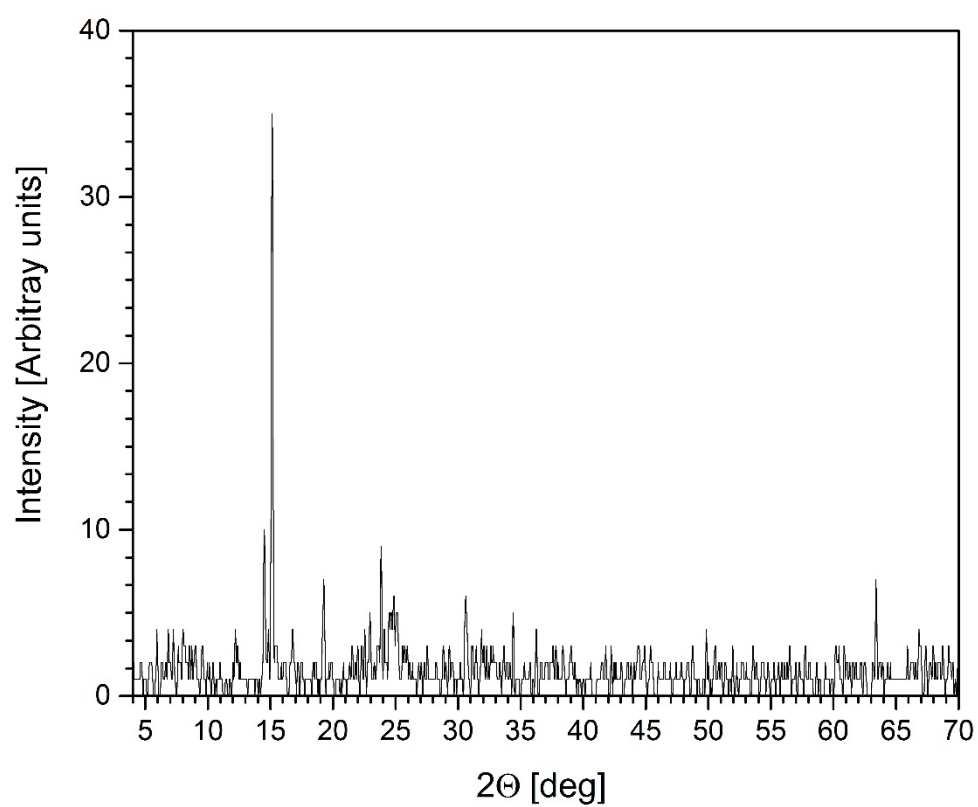

**ESI Figure S12.** The powder XRD of the evaporation residue from the aqueous extract of the decomposition intermediate made in boiling toluene from compound **1**.

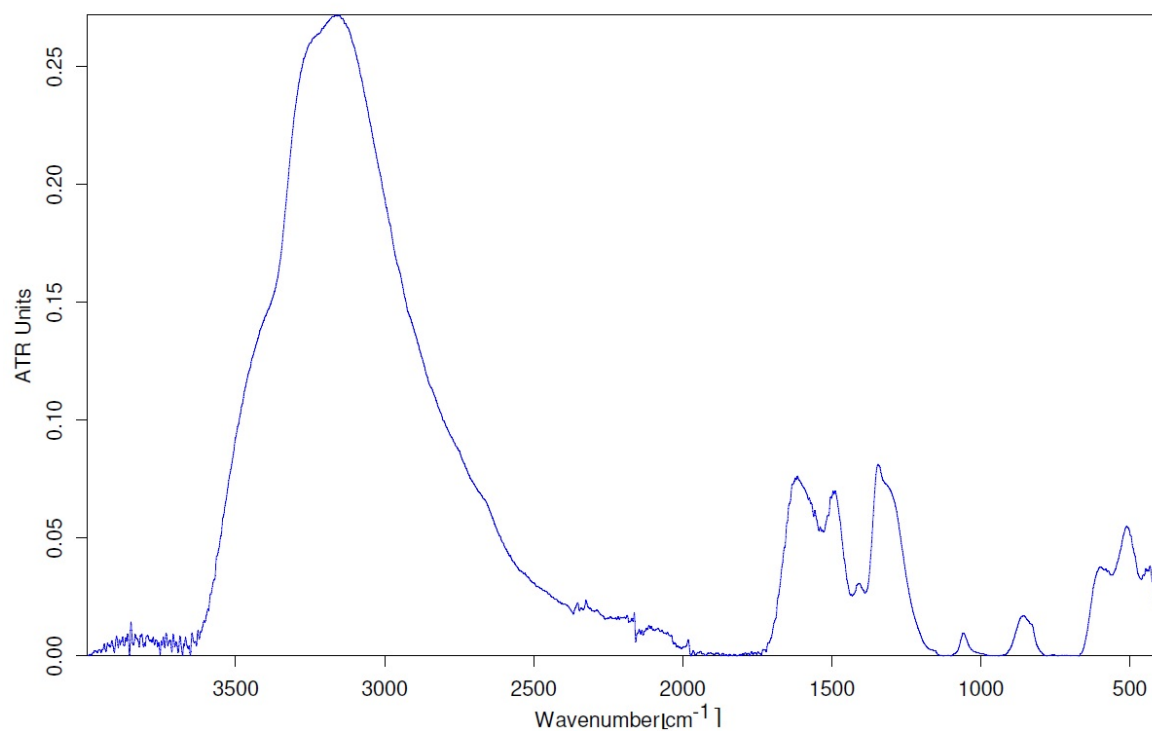

**ESI Figure S13.** The IR spectra of the water-insoluble decomposition residue of the decomposition intermediate made in boiling toluene from compound **1**.

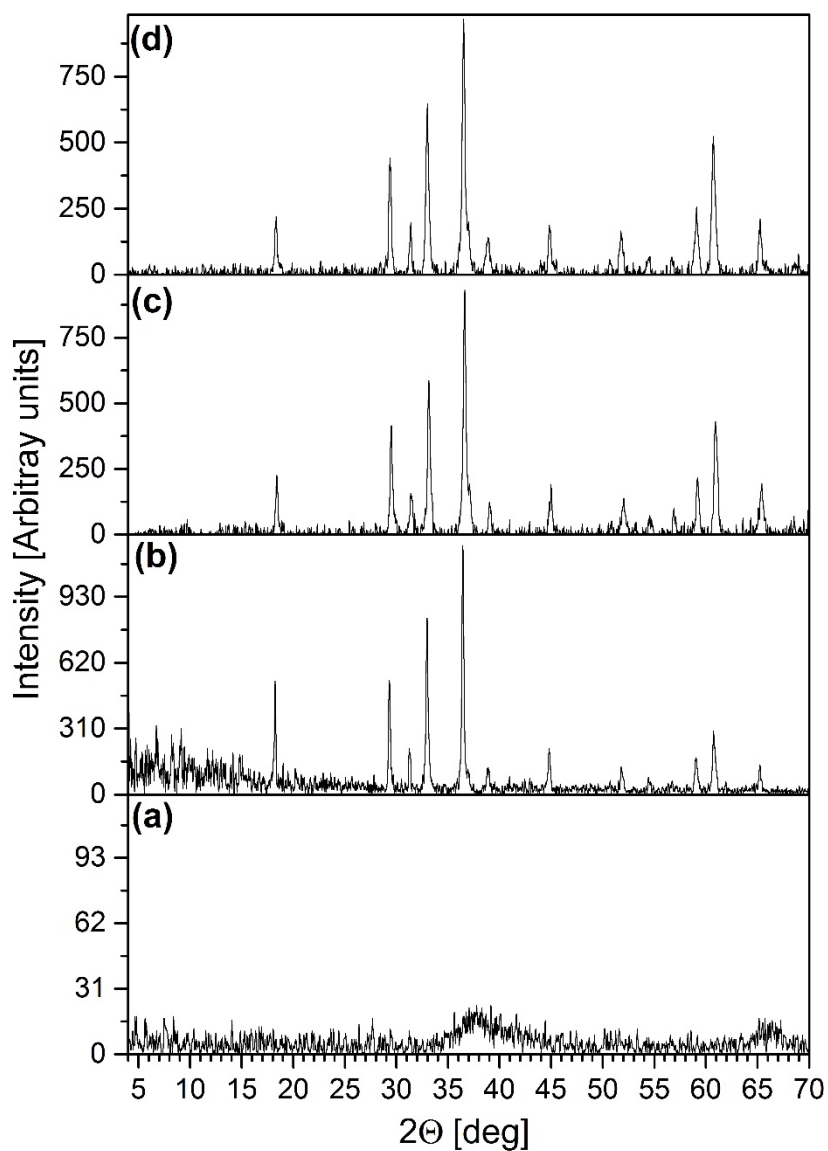

**ESI Figure 14.** The powder X-ray diffractograms of the decomposition intermediates and products of compound **2**: **(a)** made by heat-treatment in toluene at 110 °C, **(b)** made by the heat treatment of compound **1** at 500 °C in air and **(c)** made from the water insoluble part of the decomposition intermediate of compound **1** made in toluene by heating at 500 °C and **(d)** made from the decomposition intermediate of compound **1** made in toluene by heating at 500 °C .
